# Supplementary material for: An Anti-proteome Nanobody Library Approach Yields a Specific Immunoassay for Trypanosoma congolense Diagnosis Targeting Glycosomal Aldolase
Source: PubMed Central journal article supplement (PMC4737498; doi:10.1371/journal.pntd.0004420), 2016-02-02
Supplement: pntd.0004420.s008.pdf [file pntd.0004420.s008.pdf]

**S1 Table. Identity matrix showing the similarity in the sequence of *T. congolense* glycosomal aldolase to that of other trypanosomes, *L. mexicana* and cattle.**

|                                     | Q3T0S5 | G0U6L2 | G0UWE7 | P07752 | TevSTIB805 <sup>a</sup><br>.10.5960 | K4DLE5 | Q9U5N6 |
|-------------------------------------|--------|--------|--------|--------|-------------------------------------|--------|--------|
| Q3T0S5                              |        | 45.1   | 46.9   | 46.9   | 47.5                                | 47.5   | 47.7   |
| G0U6L2                              | 45.1   |        | 85.2   | 86.0   | 86.6                                | 84.9   | 80.9   |
| G0UWE7                              | 46.9   | 85.2   |        | 94.1   | 94.9                                | 87.9   | 80.1   |
| P07752                              | 46.9   | 86.0   | 94.1   |        | 99.2                                | 86.3   | 79.8   |
| TevSTIB805 <sup>a</sup><br>.10.5960 | 47.5   | 86.6   | 94.9   | 99.2   |                                     | 87.1   | 80.4   |
| K4DLE5                              | 47.5   | 84.9   | 87.9   | 86.3   | 87.1                                |        | 79.8   |
| Q9U5N6                              | 47.7   | 80.9   | 80.1   | 79.8   | 80.4                                | 79.8   |        |

*T. congolense* (UniProtKB accession no. G0UWE7), cattle (UniProtKB accession no. Q3T0S5), *T. vivax* (UniProtKB accession no. G0U6L2), *T. brucei* (UniProtKB accession no. P07752), *T. evansi* (TriTrypDB accession no. TevSTIB805.10.5960), *T. cruzi* (UniProtKB accession no. K4LE5) and *L. mexicana* (UniProtKB accession no. Q9U5N6).

<sup>a</sup> TriTrypDB accession no. TevSTIB805.10.5960.
